# Supplementary material for: Aborting meiosis allows recombination in sterile diploid yeast hybrids
Source: PubMed Central journal article supplement (PMC8589840; doi:10.1038/s41467-021-26883-8), 2021-11-12
Supplement: 41467_2021_26883_MOESM3_ESM.pdf [file 41467_2021_26883_MOESM3_ESM.pdf]

## **Description of Additional Supplementary Files**

File Name: Supplementary Data 1

Description: Strains used in the study

File Name: Supplementary Data 2

Description: Sporulation efficiency of the strains used in the 5-FOA assay

File Name: Supplementary Data 3

Description: Spore viability of the diploids hybrids and derived RTG samples

File Name: Supplementary Data 4

Description: Average growth percentage on 5-FOA and Canavanine for the diploid hybrids used in this work

File Name: Supplementary Data 5

Description: Environments used for phenotyping

File Name: Supplementary Data 6

Description: Summary statistics of LOHs

File Name: Supplementary Data 7

Description: Breakpoints heterozygosity statistics

File Name: Supplementary Data 8

Description: Mutfunc analysis of aminoacid mutations in the ScMA CDS

File Name: Supplementary Data 9

Description: List of samples sequenced

File Name: Supplementary Data 10

Description: LOH breakpoints association with meiotic hotspot on chrII-R

File Name: Supplementary Data 11

Description: Genome-wide LOH breakpoints association with meiotic hotspots

File Name: Supplementary Data 12

Description: Primers used in the study

File Name: Supplementary Data 13

Description: RTG analysis of reciprocal non-reciprocal markers in LOH

File Name: Supplementary Data 14

Description: Environments with BPH and WPH

File Name: Supplementary Data 15

Description: Mean number of LOHs (per sample per Mbp) detected in ScMA/ScNA hybrids
